# Supplementary material
Source: publisher figshare collection journal article supplement (https://tandf.figshare.com/ndownloader/files/14442335)
Supplement: Supplementary file 1 [file 14442335]

## Supplementary materials

Table 1: Results of existing simulation studies regarding the three performance criteria. The first column indicates the study in which the results were found, the second column the outcome measure that was used, the third column the scenario(s) under which the results were found and the last column the order of performance for the methods under study, where  $a > b$  indicates that method a performed better than method b, and  $a \approx b$  indicates that the methods performed about equally well.

| Study <sup>1</sup>      | Outcome measure                        | Condition                                    | Result                                                                          |
|-------------------------|----------------------------------------|----------------------------------------------|---------------------------------------------------------------------------------|
|                         | <b>Value of the objective function</b> |                                              |                                                                                 |
| [Zhu et al., 2016]      | Expected potential outcome             | If tree-based regime                         | TR1>EE4>TR3>TR9                                                                 |
| [Zhu et al., 2016]      | Expected potential outcome             | If linear regime                             | TR9>TR1 $\approx$ EE4>TR3                                                       |
| [Laber and Zhao, 2015]  | Expected potential outcome             | If 2 treatments & tree-based regime          | TR3>TR7                                                                         |
| [Laber and Zhao, 2015]  | Expected potential outcome             | If 2 treatments & non tree-based regime      | TR7>TR3                                                                         |
| [Laber and Zhao, 2015]  | Expected potential outcome             | If continuous treatment                      | TR3>TR7                                                                         |
| [Xu et al., 2015]       | Expected potential outcome             | -                                            | TR4>TR10>EE4 $\approx$ SE8 $\approx$ TR9 $\approx$ TR14                         |
| [Zhang et al., 2015]    | Expected potential outcome             | If decision list regime                      | TR5>TR7 $\approx$ SE4>TR10                                                      |
| [Zhang et al., 2015]    | Expected potential outcome             | If linear regime                             | TR7 $\approx$ SE4>TR5 $\approx$ TR10                                            |
| [Zhang et al., 2015]    | Expected potential outcome             | If non-linear regime                         | TR5>TR7 $\approx$ SE4>TR10                                                      |
| [Zhao et al., 2015]     | Expected potential outcome             | If correct model for survival time           | TR7>TR6                                                                         |
| [Zhao et al., 2015]     | Expected potential outcome             | If incorrect model for survival time         | TR6>TR7                                                                         |
| [Huang and Fong, 2014]  | Expected potential outcome             | If linear regime                             | SE4>TR11b <sup>2</sup> >TR8a <sup>3</sup> >TR11a>TR8b>TR10b <sup>4</sup> >TR10a |
| [Huang and Fong, 2014]  | Expected potential outcome             | If linear regime & outliers                  | TR8a>TR11b>TR11a>TR8b>TR10b>TR7>TR10a                                           |
| [Huang and Fong, 2014]  | Expected potential outcome             | If non-linear regime                         | TR11b>TR8b $\approx$ TR10b>TR8a $\approx$ TR11a>TR7>TR10a                       |
| [Huang and Fong, 2014]  | Expected potential outcome             | If non-linear regime & outliers              | TR8b $\approx$ TR10b>TR11b>TR11a>TR8a>TR7>TR10a                                 |
| [Huang and Fong, 2014]  | Expected potential outcome             | If highly non-linear regime                  | TR8b $\approx$ TR10b>TR11b>TR11a>TR8a>TR10a>TR7                                 |
| [Foster et al., 2014]   | Expected potential outcome             | -                                            | EE1>SE8>EE4                                                                     |
| [Zhang et al., 2012b]   | Expected potential outcome             | If tree-based regime & sample size 200       | TR12b <sup>5</sup> >TR11b>TR7>TR12a                                             |
| [Zhang et al., 2012b]   | Expected potential outcome             | If tree-based regime & sample size 500       | TR12b >TR11b>TR12a>TR7                                                          |
| [Zhang et al., 2012b]   | Expected potential outcome             | If tree-based regime & sample size 1000      | TR12b>TR12a>TR11b>TR7                                                           |
| [Zhang et al., 2012b]   | Expected potential outcome             | If tree-based regime & incorrect prop. model | TR12b>TR11b>TR7>TR12a                                                           |
| [Zhang et al., 2012b]   | Expected potential outcome             | If linear regime & sample size $\leq 500$    | TR11b>TR7>TR12b>TR12a                                                           |
| [Zhang et al., 2012b]   | Expected potential outcome             | If linear regime & sample size $> 500$       | TR11b>TR12b>TR7>TR12a                                                           |
| [Zhang et al., 2012a]   | Expected potential outcome             | If linear regime & correct model             | TR7 $\approx$ TR11b>TR11a                                                       |
| [Zhang et al., 2012a]   | Expected potential outcome             | If linear regime & incorrect model           | TR11b>TR11a>TR7                                                                 |
| [Zhang et al., 2012a]   | Expected potential outcome             | If non-linear regime                         | TR11b>TR11a>TR7                                                                 |
| [Qian and Murphy, 2011] | Expected potential outcome             | If correctly modelled treatment effect       | TR14 $\approx$ TR7                                                              |
| [Qian and Murphy, 2011] | Expected potential outcome             | If incorrectly modelled treatment effect     | TR14>TR7                                                                        |
| [Zhao et al., 2012]     | MSE of expected potential outcome      | If sample size $< 200$                       | TR10>TR14>TR7                                                                   |
| [Zhao et al., 2012]     | MSE of expected potential outcome      | If sample size $\geq 200$                    | TR10 $\approx$ TR14 $\approx$ TR7                                               |
| [Loh et al., 2015]      | Accuracy estimated effect size         | If only predictive covariates                | SE10>SE2 $\approx$ EE4>SE1>EE3 $\approx$ SE8                                    |

| Study <sup>1</sup>        | Outcome measure                           | Condition                             | Result                    |
|---------------------------|-------------------------------------------|---------------------------------------|---------------------------|
| [Loh et al., 2015]        | Accuracy estimated effect size            | If predictive & prognostic covariates | SE1>EE3>EE4>SE8>SE2≈SE11  |
| [Foster et al., 2011]     | Accuracy estimated enhanced effect        | -                                     | EE4>TR7                   |
| [Foster et al., 2014]     | Strength enhanced treatment effect        | -                                     | EE4 >SE8>EE1              |
| [Tian et al., 2014]       | Agreement estimated vs. true effect       | -                                     | SE4>TR7                   |
| <b>Recovery</b>           |                                           |                                       |                           |
| [Loh et al., 2015]        | Correct split variables selected          | If only predictive covariates         | SE2≈SE10≈EE4>SE1≈SE8>EE3  |
| [Loh et al., 2015]        | Correct split variables selected          | If predictive & prognostic covariates | SE1≈SE8>EE3>EE43>SE10≈SE2 |
| [Foster et al., 2014]     | Correct split variables selected          | -                                     | EE4>SE8>EE1               |
| [Foster et al., 2011]     | Correct split variables selected          | -                                     | EE4>TR7                   |
| [Tian et al., 2014]       | Number of correctly selected covariates   | -                                     | SE4>TR7                   |
| [Kehl and Ulm, 2006]      | Correct subgroups identified              | If weak interaction                   | EE5>TR7                   |
| [Kehl and Ulm, 2006]      | Correct subgroups identified              | If strong interaction                 | EE5≈TR7                   |
| [Zhu et al., 2016]        | Correct treatment assignment              | If tree-based regime                  | TR1>EE4>TR9>TR3           |
| [Zhu et al., 2016]        | Correct treatment assignment              | If linear regime                      | TR9>TR1>EE4>TR3           |
| [Xu et al., 2015]         | Correct treatment assignment              | -                                     | TR4≈TR10>EE4≈SE8≈TR9≈TR14 |
| [Imai et al., 2013]       | Correct treatment assignment              | -                                     | TR9>TR14                  |
| [Zhao et al., 2012]       | MSE of misclassification rate             | -                                     | TR10>TR7>TR14             |
| [Imai et al., 2013]       | False discovery rate largest effect       | If sample size $\leq 1000$            | TR9>TR14                  |
| [Imai et al., 2013]       | False discovery rate largest effect       | If sample size 5000                   | TR14>TR9                  |
| [Imai et al., 2013]       | False discovery rate four largest effects | -                                     | TR9>TR14                  |
| [Imai et al., 2013]       | Discovery rate largest effect             | -                                     | TR14>TR9                  |
| [Imai et al., 2013]       | Discovery rate four largest effects       | If sample size $\leq 1000$            | TR14>TR9                  |
| [Imai et al., 2013]       | Discovery rate four largest effects       | If sample size 5000                   | TR9>TR14                  |
| <b>Inferential errors</b> |                                           |                                       |                           |
| [Loh et al., 2015]        | Type I error                              | -                                     | SE8>SE1>EE3>SE2≈SE10≈EE4  |
| [Foster et al., 2011]     | Type I error                              | -                                     | TR7>EE4                   |
| [Loh et al., 2015]        | Type II error                             | -                                     | SE1≈EE4≈EE3≈SE2≈SE10>SE8  |
| [Foster et al., 2011]     | Type II error                             | -                                     | EE4>TR7                   |
| [Kehl and Ulm, 2006]      | Type II error                             | If weak or medium interaction         | EE5>TR7                   |
| [Kehl and Ulm, 2006]      | Type II error                             | If strong interaction                 | EE5≈TR7                   |

<sup>1</sup> The abbreviations were introduced in Table 1.

<sup>2</sup> TR11a refers to the method with the maximization of the expected potential outcome based on the IPWE, TR11b refers to the method with the maximization of the expected potential outcome based on the AIPWE.

<sup>3</sup> TR8a refers to the method with linear kernel, TR8b to the method with Radial Basis Function (RBF) kernel.

<sup>4</sup> TR10a refers to the method with linear kernel, TR10b to the method with RBF kernel.

<sup>5</sup> TR12a refers to the method with estimation of the contrasts based on the IPWE, TR12b to estimation of the contrasts based on the AIPWE.

Table 2: Overview of available software for the methods for detecting subgroups involved in treatment-subgroup interactions from the data in a post-hoc manner. The first column indicates the method, the second column indicates the name of the package, the third column the type of software or code, and the fourth column where it can be found. The fifth column indicates whether the software or code is documented or not, and the last column indicates whether the authors that proposed the method were involved in creating the software or code.

| Method <sup>1</sup> | Name package             | Form <sup>2</sup>   | Location                   | Documentation publicly available? | Authors method involved? |
|---------------------|--------------------------|---------------------|----------------------------|-----------------------------------|--------------------------|
| EE3                 | SIDES                    | dedicated R-package | CRAN                       | Yes                               | No                       |
|                     | SIDESxl                  | excel add-in        | BioPharmNet                | No                                | Yes                      |
| EE4                 | –                        | R-code              | BioPharmNet                | No                                | Yes                      |
| SE1                 | GUIDE                    | executable          | author’s page <sup>3</sup> | Yes                               | Yes                      |
| SE2                 | GUIDE                    | executable          | author’s page <sup>3</sup> | Yes                               | Yes                      |
| SE5                 | QUINT                    | dedicated R-package | CRAN                       | Yes                               | Yes                      |
| SE7                 | STIMA                    | dedicated R-package | author’s page <sup>4</sup> | Yes                               | Yes                      |
| SE8                 | –                        | R-code              | BioPharmNet                | No                                | Yes                      |
| SE10                | PARTY                    | broad R-package     | CRAN                       | Yes                               | Yes                      |
| SE13                | DSBayes                  | R-package           | CRAN                       | Yes                               | No                       |
| TR1                 | –                        | R-code              | supp. mat.                 | No                                | Yes                      |
| TR2                 | –                        | R-code              | appendix                   | No                                | Yes                      |
| TR4                 | –                        | R-code              | supp. mat.                 | No                                | Yes                      |
| TR5                 | –                        | R-code              | author’s page <sup>5</sup> | No                                | Yes                      |
| TR7                 | DTRlearn;                | broad R-package     | CRAN                       | Yes                               | Yes                      |
|                     | DynTxRegime              | broad R-package     | CRAN                       | Yes                               | Yes                      |
| TR8                 | –                        | R-code              | supp. mat.                 | No                                | Yes                      |
| TR9                 | FindIt                   | dedicated R-package | CRAN                       | Yes                               | Yes                      |
| TR10                | DTRlearn;                | broad R-package     | CRAN                       | Yes                               | Yes                      |
|                     | DynTxRegime              | broad R-package     | CRAN                       | Yes                               | No                       |
| TR11                | DynTxRegime              | broad R-package     | CRAN                       | Yes                               | Yes                      |
| TR12                | DynTxRegime              | broad R-package     | CRAN                       | Yes                               | Yes                      |
|                     | e.g., RPART <sup>6</sup> | general R-package   | CRAN                       | Yes                               | No                       |
| TR13                | LARS <sup>7</sup>        | general R-package   | CRAN                       | Yes                               | No                       |

Note. A dash means that the software or source code does not have a name.

<sup>1</sup> The abbreviations were introduced in Table 1.

<sup>2</sup> *Dedicated R-package*: An R-package that is only dedicated to the method under study.

*Excel add-in*: Software that can be ran in Microsoft Excel.

*R-code*: R-code that has not been organized into a package.

*Executable*: A program that can be ran by a computer, but for which the source cannot be read by the user.

*Broad R-package*: An R-package that includes both functions related to the method under study and functions not related to the method under study.

*General R-package*: An R-package that was developed for another (broader) purpose, that can be used (with some adjustments or preprocessing steps) to apply the method under study.

<sup>3</sup> <http://www.stat.wisc.edu/~loh/guide.html>

<sup>4</sup> <http://www.elisedusseldorp.nl/Index.php?type=6>

<sup>5</sup> <http://www4.ncsu.edu/~yzhang52/>

<sup>6</sup> Several existing general packages may be used to minimize the weighted misclassification error, depending on the methodology one wants to use for it.

<sup>7</sup> Examples for how to apply the method using lars included in supplementary materials

## References

- [Foster et al., 2014] Foster, J., Taylor, J., Kaciroti, N., and Nan, B. (2014). Simple subgroup approximations to optimal treatment regimes from randomized clinical trial data. *Biostatistics*, 16(2):368–382.
- [Foster et al., 2011] Foster, J., Taylor, J., and Ruberg, S. (2011). Subgroup identification from randomized clinical trial data. *Statistics in Medicine*, 30(24):2867–2880.
- [Huang and Fong, 2014] Huang, Y. and Fong, Y. (2014). Identifying optimal biomarker combinations for treatment selection via a robust kernel method. *Biometrics*, 70(4):891–901.
- [Imai et al., 2013] Imai, K., Ratkovic, M., et al. (2013). Estimating treatment effect heterogeneity in randomized program evaluation. *The Annals of Applied Statistics*, 7(1):443–470.
- [Kehl and Ulm, 2006] Kehl, V. and Ulm, K. (2006). Responder identification in clinical trials with censored data. *Computational Statistics & Data Analysis*, 50(5):1338–1355.
- [Laber and Zhao, 2015] Laber, E. and Zhao, Y. (2015). Tree-based methods for individualized treatment regimes. *Biometrika*, 102(3):501–514.
- [Loh et al., 2015] Loh, W., He, X., and Man, M. (2015). A regression tree approach to identifying subgroups with differential treatment effects. *Statistics in Medicine*, 34(11):1818–1833.
- [Qian and Murphy, 2011] Qian, M. and Murphy, S. (2011). Performance guarantees for individualized treatment rules. *Annals of Statistics*, 39(2):1180.
- [Tian et al., 2014] Tian, L., Alizadeh, A., Gentles, A., and Tibshirani, R. (2014). A simple method for estimating interactions between a treatment and a large number of covariates. *Journal of the American Statistical Association*, 109(508):1517–1532.
- [Xu et al., 2015] Xu, Y., Yu, M., Zhao, Y., Li, Q., Wang, S., and Shao, J. (2015). Regularized outcome weighted subgroup identification for differential treatment effects. *Biometrics*, 71(3):645–653.
- [Zhang et al., 2012a] Zhang, B., Tsiatis, A., Davidian, M., Zhang, M., and Laber, E. (2012a). Estimating optimal treatment regimes from a classification perspective. *Stat*, 1(1):103–114.
- [Zhang et al., 2012b] Zhang, B., Tsiatis, A., Laber, E., and Davidian, M. (2012b). A robust method for estimating optimal treatment regimes. *Biometrics*, 68(4):1010–1018.
- [Zhang et al., 2015] Zhang, Y., Laber, E., Tsiatis, A., and Davidian, M. (2015). Using decision lists to construct interpretable and parsimonious treatment regimes. *Biometrics*, 71(4):895–904.
- [Zhao et al., 2015] Zhao, Y., Zeng, D., Laber, E., Song, R., Yuan, M., and Kosorok, M. (2015). Doubly robust learning for estimating individualized treatment with censored data. *Biometrika*, 102(1):151–168.
- [Zhao et al., 2012] Zhao, Y., Zeng, D., Rush, A., and Kosorok, M. (2012). Estimating individualized treatment rules using outcome weighted learning. *Journal of the American Statistical Association*, 107(499):1106–1118.
- [Zhu et al., 2016] Zhu, R., Zhao, Y., Chen, G., Ma, S., and Zhao, H. (2016). Greedy outcome weighted tree learning of optimal personalized treatment rules. *Biometrics*.
